# Supplementary material
Source: MDPI journal article supplement (https://www.mdpi.com/2673-3269/4/4/42)
Supplement: s1 [file s1]

# **Blue-Noise-Based Disordered Photonic Structures Show Isotropic and Ultrawide Band Gaps. Supporting Information.**

Edoardo De Tommasi<sup>1</sup>, Silvia Romano<sup>1</sup>, and Gianluigi Zito<sup>1</sup>

<sup>1</sup>*National Research Council, Institute of Applied Sciences and  
Intelligent Systems “E. Caianiello”, Unit of Naples, Via P.  
Castellino 111, I-80131, Naples, Italy*

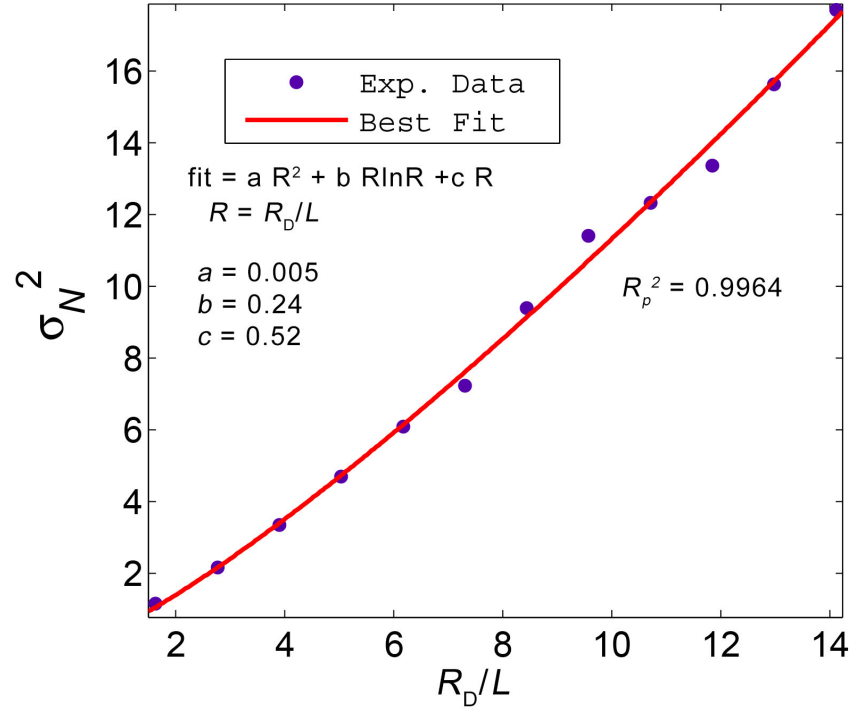

Figure S1: **Statistical analysis of the spatial fluctuations of the FPO pattern.** Experimental data from simulations (blue dots) and best fit (red curve) relative to the variance number  $\sigma_N^2$  as a function of the normalized pattern size  $R = R_D/L$ , with  $R_D$  radius of the sampling disk and  $L$  size of the square pattern. The fit curve is expressed as  $\sigma_N^2(R) = a R^2 + b R \ln(R) + c R$ , with  $a, b, c$  fitting parameters.
